# Supplementary material for: Profiling RNA-Seq at multiple resolutions markedly increases the number of causal eQTLs in autoimmune disease
Source: PubMed Central journal article supplement (PMC5695635; doi:10.1371/journal.pgen.1007071), 2017-10-23
Supplement: pgen.1007071.s001.pdf [file pgen.1007071.s001.pdf]

S1 Table

SLE GWAS in persons of European Descent (38 loci taken forward for *cis*-eQTL analysis).

| SNP        | Chr   | hg19 position | Candidate gene        | P-value                 | Odds Ratio (95% CI) | Ancestral Allele |
|------------|-------|---------------|-----------------------|-------------------------|---------------------|------------------|
| rs2476601  | chr1  | 114377568     | <i>PTPN22</i>         | $1.10 \times 10^{-28}$  | 1.43 (1.34–1.53)    | G                |
| rs1801274  | chr1  | 161479745     | <i>FCGR2A</i>         | $1.04 \times 10^{-12}$  | 1.16 (1.11–1.21)    | A                |
| rs704840   | chr1  | 173226195     | <i>TNFSF4</i>         | $3.12 \times 10^{-19}$  | 1.22 (1.17–1.27)    | G                |
| rs17849501 | chr1  | 183542323     | <i>SMG7, NCF2</i>     | $3.45 \times 10^{-88}$  | 2.10 (1.95–2.26)    | C                |
| rs3024505  | chr1  | 206939904     | <i>IL10</i>           | $4.64 \times 10^{-9}$   | 1.17 (1.11–1.24)    | G                |
| rs9782955  | chr1  | 236039877     | <i>LYST</i>           | $1.25 \times 10^{-9}$   | 1.16 (1.11–1.22)    | C                |
| rs2111485  | chr2  | 163110536     | <i>IFIH1</i>          | $1.27 \times 10^{-11}$  | 1.15 (1.11–1.20)    | A                |
| rs7574865  | chr2  | 191964633     | <i>STAT4</i>          | $5.59 \times 10^{-122}$ | 1.73 (1.65–1.81)    | T                |
| rs3768792  | chr2  | 213871709     | <i>IKZF2</i>          | $1.21 \times 10^{-13}$  | 1.24 (1.17–1.31)    | A                |
| rs9311676  | chr3  | 58470351      | <i>ABHD6, PXX</i>     | $3.06 \times 10^{-14}$  | 1.17 (1.13–1.22)    | C                |
| rs564799   | chr3  | 159728987     | <i>IL12A</i>          | $1.54 \times 10^{-9}$   | 1.14 (1.09–1.18)    | C                |
| rs10028805 | chr4  | 102737250     | <i>BANK1</i>          | $4.31 \times 10^{-17}$  | 1.20 (1.15–1.25)    | A                |
| rs7726414  | chr5  | 133431834     | <i>TCF7, SKP1</i>     | $4.44 \times 10^{-16}$  | 1.45 (1.32–1.58)    | C                |
| rs10036748 | chr5  | 150458146     | <i>TNIP1</i>          | $1.27 \times 10^{-45}$  | 1.38 (1.32–1.45)    | T                |
| rs2431697  | chr5  | 159879978     | <i>MIR146A</i>        | $8.01 \times 10^{-28}$  | 1.26 (1.21–1.31)    | C                |
| rs11755393 | chr6  | 34824636      | <i>UHRF1BP1</i>       | $7.55 \times 10^{-9}$   | 1.14 (1.09–1.19)    | G                |
| rs6568431  | chr6  | 106588806     | <i>PRDM1, ATG5</i>    | $5.04 \times 10^{-14}$  | 1.21 (1.15–1.27)    | C                |
| rs6920220  | chr6  | 138006504     | <i>TNFAIP3</i>        | $1.97 \times 10^{-31}$  | 1.83 (1.65–2.02)    | G                |
| rs849142   | chr7  | 28185891      | <i>JAZF1</i>          | $8.61 \times 10^{-11}$  | 1.14 (1.10–1.19)    | T                |
| rs4917014  | chr7  | 50305863      | <i>IKZF1</i>          | $6.39 \times 10^{-14}$  | 1.18 (1.13–1.24)    | T                |
| rs10488631 | chr7  | 128594183     | <i>IRF5</i>           | $9.37 \times 10^{-110}$ | 1.92 (1.81–2.03)    | T                |
| rs2736340  | chr8  | 11343973      | <i>BLK</i>            | $6.28 \times 10^{-20}$  | 1.29 (1.22–1.37)    | C                |
| rs2663052  | chr10 | 50069395      | <i>WDFY4</i>          | $5.25 \times 10^{-9}$   | 1.16 (1.10–1.22)    | G                |
| rs4948496  | chr10 | 63805617      | <i>ARID5B</i>         | $1.04 \times 10^{-10}$  | 1.14 (1.10–1.19)    | C                |
| rs4963128  | chr11 | 589564        | <i>IRF7</i>           | $8.81 \times 10^{-10}$  | 1.23 (1.15–1.31)    | T                |
| rs2732549  | chr11 | 35088399      | <i>CD44</i>           | $1.20 \times 10^{-23}$  | 1.24 (1.19–1.29)    | A                |
| rs3794060  | chr11 | 71187679      | <i>DHCR7, NADSYN1</i> | $1.32 \times 10^{-20}$  | 1.23 (1.18–1.29)    | C                |
| rs7941765  | chr11 | 128499000     | <i>ETSI, FLII</i>     | $1.35 \times 10^{-10}$  | 1.14 (1.10–1.19)    | C                |
| rs10774625 | chr12 | 111910219     | <i>SH2B3</i>          | $4.09 \times 10^{-9}$   | 1.13 (1.08–1.18)    | G                |
| rs1059312  | chr12 | 129278864     | <i>SLC15A4</i>        | $1.48 \times 10^{-13}$  | 1.17 (1.12–1.21)    | A                |
| rs4902562  | chr14 | 68731458      | <i>RAD51B</i>         | $6.15 \times 10^{-10}$  | 1.14 (1.09–1.19)    | G                |
| rs2289583  | chr15 | 75311036      | <i>CSK</i>            | $6.22 \times 10^{-15}$  | 1.19 (1.14–1.24)    | C                |
| rs9652601  | chr16 | 11174365      | <i>CIITA, SOCS1</i>   | $7.42 \times 10^{-17}$  | 1.21 (1.15–1.26)    | G                |
| rs11860650 | chr16 | 31326706      | <i>ITGAM</i>          | $3.39 \times 10^{-76}$  | 1.71 (1.61–1.81)    | C                |
| rs11644034 | chr16 | 85972612      | <i>IRF8</i>           | $9.58 \times 10^{-18}$  | 1.25 (1.19–1.32)    | G                |
| rs2286672  | chr17 | 4712617       | <i>PLD2</i>           | $2.93 \times 10^{-9}$   | 1.25 (1.16–1.35)    | C                |
| rs2304256  | chr19 | 10475652      | <i>TYK2</i>           | $3.50 \times 10^{-13}$  | 1.24 (1.17–1.31)    | C                |
| rs7444     | chr22 | 21976934      | <i>UBE2L3</i>         | $1.84 \times 10^{-22}$  | 1.27 (1.21–1.33)    | C                |

Associations taken from the *Bentham & Morris et al 2015* SLE GWAS in persons of European descent (4,036 cases and 6,969 controls). See original publication for full details. Only non-MHC, MAF > 5%, non-conditional associations were kept for eQTL analysis (leaving these 38 loci in total).
