# Supplementary material for: Profiling RNA-Seq at multiple resolutions markedly increases the number of causal eQTLs in autoimmune disease
Source: PubMed Central journal article supplement (PMC5695635; doi:10.1371/journal.pgen.1007071), 2017-10-23
Supplement: pgen.1007071.s002.pdf [file pgen.1007071.s002.pdf]

S2 Table

SLE associated *cis*-eQTL associations deemed to be causal as defined by the JLIM pipeline (this is the output from JLIM).

| Level    | Target                               | Name           | idxRS     | chrom | idxBP    | idxP     | idx2BP   | idx2P    | minP2    | STAT        | p        | FDR      |
|----------|--------------------------------------|----------------|-----------|-------|----------|----------|----------|----------|----------|-------------|----------|----------|
| Exon     | ENSG00000154319.10 11278972 11282145 | <i>FAM167A</i> | rs2736340 | 8     | 11343973 | 2.14E-16 | 11339965 | 1.35E-18 | 5.10E-46 | 46.71504784 | 0        | 0        |
| Trans    | ENST00000284486.4                    | <i>FAM167A</i> | rs2736340 | 8     | 11343973 | 2.14E-16 | 11339965 | 1.35E-18 | 4.43E-45 | 48.80642864 | 0        | 0        |
| Gene     | ENSG00000154319.10                   | <i>FAM167A</i> | rs2736340 | 8     | 11343973 | 2.14E-16 | 11339965 | 1.35E-18 | 2.31E-40 | 42.24461359 | 0        | 0        |
| Exon     | ENSG00000154319.10 11301540 11302395 | <i>FAM167A</i> | rs2736340 | 8     | 11343973 | 2.14E-16 | 11339965 | 1.35E-18 | 4.63E-33 | 26.5489187  | 0        | 0        |
| Exon     | ENSG00000136573.6 11417842 11418961  | <i>BLK</i>     | rs2736340 | 8     | 11343973 | 2.14E-16 | 11339965 | 1.35E-18 | 1.41E-31 | 14.15188659 | 0        | 0        |
| Exon     | ENSG00000136573.6 11407668 11407771  | <i>BLK</i>     | rs2736340 | 8     | 11343973 | 2.14E-16 | 11339965 | 1.35E-18 | 4.41E-30 | 15.35338136 | 0        | 0        |
| Exon     | ENSG00000136573.6 11412252 11412398  | <i>BLK</i>     | rs2736340 | 8     | 11343973 | 2.14E-16 | 11339965 | 1.35E-18 | 5.59E-30 | 8.78106877  | 0        | 0        |
| Exon     | ENSG00000136573.6 11414167 11414346  | <i>BLK</i>     | rs2736340 | 8     | 11343973 | 2.14E-16 | 11339965 | 1.35E-18 | 1.14E-29 | 10.05135904 | 0        | 0        |
| Exon     | ENSG00000136573.6 11420488 11420619  | <i>BLK</i>     | rs2736340 | 8     | 11343973 | 2.14E-16 | 11339965 | 1.35E-18 | 6.02E-29 | 9.697875438 | 0        | 0        |
| Exon     | ENSG00000136573.6 11415471 11415547  | <i>BLK</i>     | rs2736340 | 8     | 11343973 | 2.14E-16 | 11339965 | 1.35E-18 | 6.03E-29 | 10.58889714 | 0        | 0        |
| Junction | 8 11418961 11420488                  | <i>BLK</i>     | rs2736340 | 8     | 11343973 | 2.14E-16 | 11339965 | 1.35E-18 | 7.60E-28 | 10.480584   | 0        | 0        |
| Junction | 8 11407771 11412252                  | <i>BLK</i>     | rs2736340 | 8     | 11343973 | 2.14E-16 | 11339965 | 1.35E-18 | 1.65E-27 | 13.92766832 | 0        | 0        |
| Junction | 8 11412993 11414167                  | <i>BLK</i>     | rs2736340 | 8     | 11343973 | 2.14E-16 | 11339965 | 1.35E-18 | 6.43E-27 | 3.659807232 | 0        | 0        |
| Junction | 8 11406631 11407668                  | <i>BLK</i>     | rs2736340 | 8     | 11343973 | 2.14E-16 | 11339965 | 1.35E-18 | 6.47E-27 | 14.9105389  | 0        | 0        |
| Gene     | ENSG00000136573.6                    | <i>BLK</i>     | rs2736340 | 8     | 11343973 | 2.14E-16 | 11339965 | 1.35E-18 | 3.29E-26 | 9.266974735 | 0        | 0        |
| Exon     | ENSG00000136573.6 11403561 11403612  | <i>BLK</i>     | rs2736340 | 8     | 11343973 | 2.14E-16 | 11339965 | 1.35E-18 | 6.39E-26 | 10.33062052 | 0        | 0        |
| Exon     | ENSG00000136573.6 11412841 11412993  | <i>BLK</i>     | rs2736340 | 8     | 11343973 | 2.14E-16 | 11339965 | 1.35E-18 | 1.42E-25 | 0.935131085 | 4.00E-04 | 0.04872  |
| Exon     | ENSG00000136573.6 11405541 11405634  | <i>BLK</i>     | rs2736340 | 8     | 11343973 | 2.14E-16 | 11339965 | 1.35E-18 | 3.68E-25 | 7.036497058 | 0        | 0        |
| Junction | 8 11400856 11403561                  | <i>BLK</i>     | rs2736340 | 8     | 11343973 | 2.14E-16 | 11339965 | 1.35E-18 | 5.18E-25 | 7.581413942 | 0        | 0        |
| Junction | 8 11403612 11405541                  | <i>BLK</i>     | rs2736340 | 8     | 11343973 | 2.14E-16 | 11339965 | 1.35E-18 | 6.35E-25 | 7.970289938 | 0        | 0        |
| Exon     | ENSG00000136573.6 11406533 11406631  | <i>BLK</i>     | rs2736340 | 8     | 11343973 | 2.14E-16 | 11339965 | 1.35E-18 | 7.44E-25 | 9.678824947 | 0        | 0        |
| Junction | 8 11414346 11415471                  | <i>BLK</i>     | rs2736340 | 8     | 11343973 | 2.14E-16 | 11339965 | 1.35E-18 | 9.84E-25 | 8.137591462 | 0        | 0        |
| Junction | 8 11415547 11418811                  | <i>BLK</i>     | rs2736340 | 8     | 11343973 | 2.14E-16 | 11339965 | 1.35E-18 | 1.25E-24 | 8.259710303 | 0        | 0        |
| Junction | 8 11405634 11406533                  | <i>BLK</i>     | rs2736340 | 8     | 11343973 | 2.14E-16 | 11339965 | 1.35E-18 | 1.83E-24 | 4.015497492 | 0        | 0        |
| Exon     | ENSG00000136573.6 11400733 11400856  | <i>BLK</i>     | rs2736340 | 8     | 11343973 | 2.14E-16 | 11339965 | 1.35E-18 | 3.04E-24 | 7.703840438 | 0        | 0        |
| Intron   | 8 11415547 11417842                  | <i>BLK</i>     | rs2736340 | 8     | 11343973 | 2.14E-16 | 11339965 | 1.35E-18 | 3.14E-24 | 15.8312491  | 0        | 0        |
| Intron   | 8 11418961 11420488                  | <i>BLK</i>     | rs2736340 | 8     | 11343973 | 2.14E-16 | 11339965 | 1.35E-18 | 6.13E-24 | 11.91425144 | 0        | 0        |
| Junction | 8 11412398 11412841                  | <i>BLK</i>     | rs2736340 | 8     | 11343973 | 2.14E-16 | 11339965 | 1.35E-18 | 3.08E-23 | 0.893095144 | 2.00E-04 | 0.035825 |
| Junction | 8 11282145 11301540                  | <i>FAM167A</i> | rs2736340 | 8     | 11343973 | 2.14E-16 | 11339965 | 1.35E-18 | 1.59E-22 | 16.81180857 | 0        | 0        |
| Junction | 8 11352100 11400733                  | <i>BLK</i>     | rs2736340 | 8     | 11343973 | 2.14E-16 | 11339965 | 1.35E-18 | 1.33E-21 | 7.531245764 | 0        | 0        |
| Exon     | ENSG00000136573.6 11351510 11352100  | <i>BLK</i>     | rs2736340 | 8     | 11343973 | 2.14E-16 | 11339965 | 1.35E-18 | 1.64E-21 | 10.02643884 | 0        | 0        |
| Trans    | ENST00000526097.1                    | <i>BLK</i>     | rs2736340 | 8     | 11343973 | 2.14E-16 | 11339965 | 1.35E-18 | 1.01E-19 | 5.784627111 | 0        | 0        |
| Junction | 8 11420619 11421412                  | <i>BLK</i>     | rs2736340 | 8     | 11343973 | 2.14E-16 | 11339965 | 1.35E-18 | 5.06E-19 | 4.399510844 | 0        | 0        |
| Intron   | 8 11414346 11415471                  | <i>BLK</i>     | rs2736340 | 8     | 11343973 | 2.14E-16 | 11339965 | 1.35E-18 | 6.48E-19 | 5.986960326 | 0        | 0        |
| Exon     | ENSG00000154319.10 11324135 11324276 | <i>FAM167A</i> | rs2736340 | 8     | 11343973 | 2.14E-16 | 11339965 | 1.35E-18 | 1.06E-16 | 13.07603944 | 0        | 0        |
| Junction | 8 11302317 11324135                  | <i>FAM167A</i> | rs2736340 | 8     | 11343973 | 2.14E-16 | 11339965 | 1.35E-18 | 1.06E-15 | 9.786471892 | 0        | 0        |
| Intron   | 8 11367400 11400733                  | <i>BLK</i>     | rs2736340 | 8     | 11343973 | 2.14E-16 | 11339965 | 1.35E-18 | 2.23E-15 | 4.423513021 | 0        | 0        |
| Intron   | 8 11304130 11324135                  | <i>FAM167A</i> | rs2736340 | 8     | 11343973 | 2.14E-16 | 11339965 | 1.35E-18 | 7.42E-15 | 8.121289646 | 0        | 0        |
| Exon     | ENSG00000185651.10 21975804 21978323 | <i>UBE2L3</i>  | rs7444    | 22    | 21976934 | 2.64E-13 | 21929566 | 9.72E-14 | 9.94E-15 | 5.887594907 | 0        | 0        |
| Trans    | ENST00000458578.2                    | <i>UBE2L3</i>  | rs7444    | 22    | 21976934 | 2.64E-13 | 21929566 | 9.72E-14 | 5.92E-14 | 9.106307634 | 0        | 0        |
| Intron   | 8 11407771 11412252                  | <i>BLK</i>     | rs2736340 | 8     | 11343973 | 2.14E-16 | 11339965 | 1.35E-18 | 1.06E-13 | 5.513216363 | 0        | 0        |
| Intron   | 8 11420619 11421412                  | <i>BLK</i>     | rs2736340 | 8     | 11343973 | 2.14E-16 | 11339965 | 1.35E-18 | 1.21E-12 | 3.125500681 | 0        | 0        |
| Intron   | 8 11282145 11301129                  | <i>FAM167A</i> | rs2736340 | 8     | 11343973 | 2.14E-16 | 11339965 | 1.35E-18 | 6.58E-12 | 1.880658068 | 0        | 0        |

|          |    |                    |           |                 |            |    |          |            |          |            |          |             |          |             |
|----------|----|--------------------|-----------|-----------------|------------|----|----------|------------|----------|------------|----------|-------------|----------|-------------|
| Intron   | 8  | 11352100           | 11366659  | <i>BLK</i>      | rs2736340  | 8  | 11343973 | 2.14E-16   | 11339965 | 1.35E-18   | 7.31E-12 | 4.169880095 | 0        | 0           |
| Trans    |    | ENST00000533828.1  |           | <i>BLK</i>      | rs2736340  | 8  | 11343973 | 2.14E-16   | 11339965 | 1.35E-18   | 1.52E-11 | 5.657495318 | 0        | 0           |
| Trans    |    | ENST00000526778.1  |           | <i>BLK</i>      | rs2736340  | 8  | 11343973 | 2.14E-16   | 11339965 | 1.35E-18   | 5.85E-11 | 3.144335221 | 1.00E-04 | 0.0181      |
| Intron   | 19 | 10473333           | 10475290  | <i>TYK2</i>     | rs2304256  | 19 | 10475652 | 1.54E-12   | 10466123 | 6.91E-13   | 2.24E-09 | 1.9265087   | 2.00E-04 | 0.0232      |
| Exon     |    | ENSG00000105397.7  | 10475527  | <i>TYK2</i>     | rs2304256  | 19 | 10475652 | 1.54E-12   | 10466123 | 6.91E-13   | 2.58E-09 | 3.196078064 | 0        | 0           |
| Exon     |    | ENSG00000185651.10 | 21965146  | <i>UBE2L3</i>   | rs7444     | 22 | 21976934 | 2.64E-13   | 21929566 | 9.72E-14   | 3.04E-09 | 2.82372309  | 0        | 0           |
| Trans    |    | ENST00000525206.1  |           | <i>BLK</i>      | rs2736340  | 8  | 11343973 | 2.14E-16   | 11339965 | 1.35E-18   | 1.12E-08 | 4.971535832 | 0        | 0           |
| Intron   | 8  | 11412993           | 11414166  | <i>BLK</i>      | rs2736340  | 8  | 11343973 | 2.14E-16   | 11339965 | 1.35E-18   | 3.41E-08 | 3.739940315 | 0        | 0           |
| Trans    |    | ENST00000292779.3  |           | <i>CCDC116</i>  | rs7444     | 22 | 21976934 | 2.64E-13   | 21929566 | 9.72E-14   | 1.45E-06 | 1.532076909 | 3.00E-04 | 0.048266667 |
| Intron   | 2  | 213881768          | 213886189 | <i>IKZF2</i>    | rs3768792  | 2  | 21387170 | 3.78E-08   | 21389023 | 2.04E-08   | 1.15E-05 | 0.952921334 | 2.00E-04 | 0.0232      |
| Exon     |    | ENSG00000153064.7  | 102750965 | <i>BANK1</i>    | rs10028805 | 4  | 10273725 | 4.51E-10   | 10275609 | 8.16E-11   | 1.85E-05 | 0.57870071  | 4.00E-04 | 0.04872     |
| Junction | 8  | 11352100           | 11366659  | <i>BLK</i>      | rs2736340  | 8  | 11343973 | 2.14E-16   | 11339965 | 1.35E-18   | 2.08E-05 | 1.70950024  | 0        | 0           |
| Gene     |    | ENSG00000161180.5  |           | <i>CCDC116</i>  | rs7444     | 22 | 21976934 | 2.64E-13   | 21929566 | 9.72E-14   | 2.50E-05 | 1.159090612 | 5.00E-04 | 0.0439      |
| Exon     |    | ENSG00000029725.11 | 5241314   | <i>RABEP1</i>   | rs2286672  | 17 | 4712617  | 0.00033644 | 4697255  | 2.45E-05   | 7.41E-05 | 1.537192432 | 4.00E-04 | 0.04872     |
| Exon     |    | ENSG00000186517.8  | 161019214 | <i>ARHGAP30</i> | rs1801274  | 1  | 16147974 | 5.56E-11   | 16147881 | 3.59E-12   | 0.000114 | 1.019783352 | 2.00E-04 | 0.029       |
| Intron   | 1  | 114292211          | 114300321 | <i>PHTF1</i>    | rs2476601  | 1  | 11437756 | 8.38E-13   | 11437756 | 8.38E-13   | 0.000144 | 3.897248985 | 1.00E-04 | 0.012373333 |
| Exon     |    | ENSG00000030419.11 | 213886368 | <i>IKZF2</i>    | rs3768792  | 2  | 21387170 | 3.78E-08   | 21389023 | 2.04E-08   | 1.96E-04 | 1.16986173  | 3.00E-04 | 0.039717391 |
| Junction | 4  | 102993557          | 102994841 | <i>BANK1</i>    | rs10028805 | 4  | 10273725 | 4.51E-10   | 10275609 | 8.16E-11   | 0.000253 | 0.516404878 | 2.00E-04 | 0.035825    |
| Exon     |    | ENSG00000153064.7  | 102993502 | <i>BANK1</i>    | rs10028805 | 4  | 10273725 | 4.51E-10   | 10275609 | 8.16E-11   | 0.000348 | 0.57083328  | 4.00E-04 | 0.04872     |
| Junction | 19 | 10657929           | 10659580  | <i>ATG4D</i>    | rs2304256  | 19 | 10475652 | 1.54E-12   | 10466123 | 6.91E-13   | 0.000385 | 0.788939164 | 2.00E-04 | 0.035825    |
| Exon     |    | ENSG00000161180.5  | 21990721  | <i>CCDC116</i>  | rs7444     | 22 | 21976934 | 2.64E-13   | 21929566 | 9.72E-14   | 0.000495 | 0.590162924 | 4.00E-04 | 0.04872     |
| Junction | 1  | 235915471          | 235916344 | <i>LYST</i>     | rs9782955  | 1  | 23603987 | 0.00079168 | 23603427 | 0.00050178 | 0.001296 | 1.058660842 | 2.00E-04 | 0.035825    |

The lead SNPs from the *Bentham and Morris et al 2015* GWAS in persons of European descent were functionally annotated by *cis*-eQTL analysis in the Geuvadis RNA-Seq cohort in lymphoblastoid cell lines using RNA-Seq quantification profiled at five resolutions (gene, transcript, exon, junction, and intron). Only SNPs reaching genome-wide significance, not conditional peaks, outside of the major histocompatibility complex loci, and with minor allele frequency > 5% were included leaving 38 SLE lead SNPs in total. All SLE loci were densely imputed to the 1000 Genomes Phase 3 Imputation Panel as described in methods.

All 38 loci (+/-100kb of each lead SNP) comprised a nominally significant *cis*-eQTL ( $P < 0.01$ ) for at least one gene within +/-500kb of the lead SNP at each resolution of RNA-Seq. Evidence of a single shared causal variant at each locus was assessed using the Joint Likelihood Mapping (JLIM) algorithm as described in methods.

Causal *cis*-eQTLs are defined where the disease association is consistent with a single shared effect for at least one *cis*-eQTL ( $P < 0.01$  and JLIM FDR adjusted  $P < 0.05$ ).

Level: RNA-Seq quantification type, Target: The expression target – defined by chromosome and genomic coordinate (hg19). IndexRs: the rs ID of the SLE GWAS SNP, idxP: The  $P$ -value of SLE association derived from the GWAS, idx2bp: the SLE association  $P$ -value of the most associated SNP within +/-100kb of the lead SNP (may be different due to the reporting of the most likely causal SNP from the original GWAS, idx2P: the  $P$ -value of the most associated SNP, minP2: The *cis*-eQTL  $P$ -value of the most associated SNP with the expression target, STAT: The JLIM statistic, p: The JLIM  $P$ -value, FDR: The false discovery rate adjusted  $P$ -value.
