# Supplementary material for: Profiling RNA-Seq at multiple resolutions markedly increases the number of causal eQTLs in autoimmune disease
Source: PubMed Central journal article supplement (PMC5695635; doi:10.1371/journal.pgen.1007071), 2017-10-23
Supplement: pgen.1007071.s004.pdf [file pgen.1007071.s004.pdf]

S4 Table

Functional annotation of SLE candidate genes detected by *cis*-eQTL analysis using RNA-Seq.

| SNP        | Gene                   | Entrez Description                              | GTEX                                | Human Protein Atlas                          | OMIM Allelic Variants                | Animal model                                                                                                                                                                                                                                                                                                                                                                                                                                                                                    | BioPlex Protein Interaction                                                                                                                           | GWAS associations                                      | PUBMED | Nearest Gene  |
|------------|------------------------|-------------------------------------------------|-------------------------------------|----------------------------------------------|--------------------------------------|-------------------------------------------------------------------------------------------------------------------------------------------------------------------------------------------------------------------------------------------------------------------------------------------------------------------------------------------------------------------------------------------------------------------------------------------------------------------------------------------------|-------------------------------------------------------------------------------------------------------------------------------------------------------|--------------------------------------------------------|--------|---------------|
| rs2476601  | <b><u>PHTF1</u></b>    | Putative homeodomain transcription factor 1     | Cerebellum, Pituitary, LCLs         | Parathyroid gland, Bone marrow               | NA                                   | NA                                                                                                                                                                                                                                                                                                                                                                                                                                                                                              | GPR156, LYPD3, CAPN5                                                                                                                                  | ATD, CRO, JIA, RA, SLE, T1D, AA, VIT                   | 0      | <i>PTPN22</i> |
| rs1801274  | <b><u>ARHGAP30</u></b> | Rho GTPase activating protein 30                | Whole blood, Spleen, LCLs           | Lymph node, Spleen, Appendix                 | NA                                   | NA                                                                                                                                                                                                                                                                                                                                                                                                                                                                                              | NA                                                                                                                                                    | CRO, UC, IBD, SLE                                      | 0      | <i>FCGR2A</i> |
| rs9782955  | <i>LYST</i>            | Lysosomal trafficking regulator                 | Whole blood, Brain, LCLs            | Bone marrow, Spleen, Appendix                | Chediak-higashi syndrome             | Affected mice segregated a seizure phenotype and grey coat colour. Melanosomes of melanocytes associated with hair follicles, the choroid layer of the eye, and neural tube-derived pigment epithelium of the retina were larger and irregularly shaped in affected mice compared with wildtype controls. Secretory vesicles in dermal mast cells of mutant skin were also enlarged.                                                                                                            | NA                                                                                                                                                    | SLE                                                    | 1      | <i>LYST</i>   |
| rs3768792  | <i>IKZF2</i>           | IKAROS family zinc finger 2                     | LCLs, Whole blood, Oesophagus       | Oesophagus, Thyroid gland, Parathyroid gland | NA                                   | Ikzf2 <sup>-/-</sup> mice had increased numbers of activated T and B cells at 5 months of age, and autoimmune disease was apparent by 6 to 8 months of age. Autoimmunity occurred earlier and was exacerbated by infection with lymphocytic choriomeningitis virus. Ikzf2 <sup>-/-</sup> Tregs developed an unstable phenotype during inflammatory responses, with reduced Foxp3 expression and increased effector cytokine expression secondary to diminished activation of the Stat5 pathway. | IKZF1, IKZF5                                                                                                                                          | SLE                                                    | 4      | <i>IKZF2</i>  |
| rs10028805 | <i>BANK1</i>           | B-cell scaffold protein with ankyrin repeats 1  | Spleen, Small intestine, Thyroid    | Lymph node, Tonsil, Spleen                   | Systemic lupus erythematosus         | Bank-deficient mice had higher levels of mature B cells and spontaneous GC B cells, particularly in response to T-dependent antigens, as well as higher serum IgG2a. Bank-deficient B cells had an enhanced proliferative response to Cd40.                                                                                                                                                                                                                                                     | NA                                                                                                                                                    | CRO, SLE, IBD, SSC                                     | 30     | <i>BANK1</i>  |
| rs2736340  | <i>BLK</i>             | BLK proto-oncogene, Src family tyrosine kinase  | LCLs, Spleen, Small intestine       | Lymph node, Tonsil, Spleen                   | Maturity-onset diabetes of the young | SYK controls pre-B cell development but does not affect NFKB induction. Saijo et al. (2003) showed that mice triple-deficient in the Src family protein tyrosine kinases (SFKs) Blk, Fyn, and Lyn but not single-deficient or Syk-deficient mice, had impaired Nkfb induction and B-cell development.                                                                                                                                                                                           | SCGB1A1, RNASE3, C20orf177, APBB3, EDEM2, SYCP3, SENP1                                                                                                | RA, SLE, SJO, SSC                                      | 52     | <i>BLK</i>    |
|            | <i>FAM167A</i>         | Family with sequence similarity 167-member A    | Thyroid, Fibroblasts, Pituitary     | Thyroid gland, Cerebral gland, Cortex        | NA                                   | NA                                                                                                                                                                                                                                                                                                                                                                                                                                                                                              | >40 interactions (49)                                                                                                                                 | RA, SLE                                                | 6      | <i>BLK</i>    |
| rs2286672  | <b><u>RABEP1</u></b>   | Rabaptin, RAB GTPase binding effector protein 1 | LCLs, Spinal cord, Substantia nigra | Parathyroid gland, Cerebral cortex, Breast   | NA                                   | NA                                                                                                                                                                                                                                                                                                                                                                                                                                                                                              | SYNC, KIAA1984, HERC2, RABGEF1, GGA2, C15orf27, EXOC1, NEFL                                                                                           | RA, SLE                                                | 0      | <i>PLD2</i>   |
| rs2304256  | <i>TYK2</i>            | Tyrosine kinase 2                               | Spleen, Whole blood, LCLs           | Spleen, Lymph node, Bone marrow              | Immunodeficiency-35                  | Karaghiosoff et al. (2000) generated Tyk2 <sup>-/-</sup> mice. In contrast to other Janus kinase family members, where inactivation leads to complete loss of the respective cytokine receptor signal, Tyk2 <sup>-/-</sup> mice showed reduced responses to Ifna1/1nb and Il12 and selective deficiency in Stat3 activation in these pathways.                                                                                                                                                  | GPR156, CDH8, GMNN, C14orf179, EFN2, MASI1, CD79A, TNFRSF13B, LRRC46, C10orf47, HAVCR2, RNF13, TMC03, C16orf71, LGALS3BP, PMEL, NLGN3, TNFRSF19, IL4R | AS, CEL, CRO, JIA, MS, PBC, PSO, RA, SLE, T1D, UC, IBD | 20     | <i>TYK2</i>   |
|            | <i>ATG4D</i>           | Autophagy related 4D cysteine peptidase         | Skin, Colon, Small intestine        | Small intestine, Duodenum, Bone marrow       | NA                                   | NA                                                                                                                                                                                                                                                                                                                                                                                                                                                                                              | GOPC, P4HA2, IMPDH1                                                                                                                                   | MS, PSO, RA, SLE                                       | 0      | <i>TYK2</i>   |
| rs7444     | <i>UBE2L3</i>          | Ubiquitin conjugating enzyme E2 L3              | LCLs, Cortex, Fibroblasts           | Cortex, Smooth muscle, Thyroid gland         | NA                                   | NA                                                                                                                                                                                                                                                                                                                                                                                                                                                                                              | ARIH1                                                                                                                                                 | CEL, CRO, JIA, MS, PSO, RA, SLE, UC, IBD               | 12     | <i>UBE2L3</i> |
|            | <i>CCDC116</i>         | Coiled-coil domain containing 116               | Testis, LCLs                        | Testis, LCLs                                 | NA                                   | NA                                                                                                                                                                                                                                                                                                                                                                                                                                                                                              | PAPSS1, GNLI                                                                                                                                          | CEL, CRO, JIA, MS, PSO, RA, SLE, UC, IBD               | 0      | <i>UBE2L3</i> |

Using publicly available resources, we systematically annotated the twelve SLE associated genes that were classified as being modulated by causal *cis*-eQTLs. The expression profiles at RNA-level across multiple cell and tissue types were interrogated in GTEx and the Human Protein Atlas - with the top three cell/tissue types documented per gene. We noted using Online Mendelian Inheritance in Man any gene-phenotype relationships by caused by allelic variants and any immune-related phenotypes of animal models. Protein-protein interactions of candidate genes were taken from the BioPlex v2.0 interaction network. Using the ImmunoBase resource, we looked up each gene and noted if the gene had been prioritized as the 'candidate gene' within the susceptibility locus per disease. Finally, we counted the number publications from PubMed found using the keywords 'gene name AND SLE'.

We have highlighted in **bold** and underlined the candidate genes that we are sceptical about due to the lack of functional support and the known functional consequences at these loci. Although the *cis*-eQTLs for these genes are classified as statistically having the same underlying causal variant as the disease association - our functional genomic data do not robustly support these genes as likely to be involved in pathogenesis. It is possible that these effects are secondary to the pathogenic effect i.e. carried as a passenger on the same functional haplotype but do not contribute to autoimmunity.
