# Supplementary material for: Profiling RNA-Seq at multiple resolutions markedly increases the number of causal eQTLs in autoimmune disease
Source: PubMed Central journal article supplement (PMC5695635; doi:10.1371/journal.pgen.1007071), 2017-10-23
Supplement: pgen.1007071.s005.pdf [file pgen.1007071.s005.pdf]

**S5 Table**

Number of expression elements that are deemed to have a causal association with the SLE risk SNP

| <b>Lead SNP</b> | <b>Gene</b>     | <b>Gene</b> | <b>Transcript</b> | <b>Exon</b> | <b>Junction</b> | <b>Intron</b> |
|-----------------|-----------------|-------------|-------------------|-------------|-----------------|---------------|
| rs2476601       | <i>PHTF1</i>    | -           | -                 | -           | -               | 1/10          |
| rs1801274       | <i>ARHGAP30</i> | -           | -                 | 1/12        | -               | -             |
| rs9782955       | <i>LYST</i>     | -           | -                 | -           | 1/34            | -             |
| rs3768792       | <i>IKZF2</i>    | -           | -                 | 1/5         | -               | 1/15          |
| rs10028805      | <i>BANK1</i>    | -           | -                 | 2/16        | -               | -             |
|                 | <i>BLK</i>      | 1/1         | 4/8               | 13/13       | 13/14           | 8/11          |
| rs2736340       | <i>FAM167A</i>  | 1/1         | 1/1               | 3/3         | 2/2             | 2/4           |
| rs2286672       | <i>RABEP1</i>   | -           | -                 | 1/18        | -               | -             |
|                 | <i>TYK2</i>     | -           | -                 | 1/23        | -               | 1/8           |
| rs2304256       | <i>ATG4D</i>    | -           | -                 | -           | 1/8             | -             |
|                 | <i>UBE2L3</i>   | -           | 1/3               | 2/4         | -               | -             |
| rs7444          | <i>CCDC116</i>  | 1/1         | -                 | 1/1         | -               | -             |

This table shows how many expression elements (i.e. number of exons, junctions, introns etc.) that are deemed to have a causal *cis*-eQTL association with the SLE associated SNP (taken from Table 3). A dashed line indicates that no causal association exists at that particular quantification type. For example, rs3768792 is a causal *cis*-eQTL for *IKZF2* at both exon- and intron-level. Out of the five exons of *IKZF2* that are included in the *cis*-eQTL analysis (some may have been dropped from analysis due to low expression etc.), only one shows a causal *cis*-eQTL association with rs3768792. The same is true for one of the fifteen introns of *IKZF2*. For *BANK1*, we were able to resolve to two exons.
