# Supplementary material for: Profiling RNA-Seq at multiple resolutions markedly increases the number of causal eQTLs in autoimmune disease
Source: PubMed Central journal article supplement (PMC5695635; doi:10.1371/journal.pgen.1007071), 2017-10-23
Supplement: pgen.1007071.s008.pdf [file pgen.1007071.s008.pdf]

| <b>S8 Table</b>                                          |                                |               |                   |                |                 |                |
|----------------------------------------------------------|--------------------------------|---------------|-------------------|----------------|-----------------|----------------|
| Summary results of genome-wide <i>cis</i> -eQTL analysis |                                |               |                   |                |                 |                |
|                                                          | <b>Test</b>                    | <b>Gene</b>   | <b>Transcript</b> | <b>Exon</b>    | <b>Junction</b> | <b>Intron</b>  |
| <b>TOTAL</b>                                             | <b>SNPs</b>                    | 1745261       | 2813231           | 3337666        | 3264551         | 3611418        |
|                                                          | <b>Genes</b>                   | 14546         | 13783             | 14042          | 10564           | 13469          |
|                                                          | <b>Targets</b>                 | 14546         | 63438             | 141117         | 127404          | 93747          |
|                                                          | <b>Distinct SNP-Gene pairs</b> | 3016012       | 6759383           | 10220224       | 9090904         | 9603702        |
|                                                          | <b>Total SNP-Target pairs</b>  | 3016012       | 9072417           | 31227090       | 24439851        | 17057283       |
| <b>SIGNIFICANT<br/>(FDR &lt; 0.05)</b>                   | <b>SNPs</b>                    | <u>458654</u> | <u>429686</u>     | <u>1256346</u> | <u>935370</u>   | <u>1144452</u> |
|                                                          | <b>Genes</b>                   | <u>8351</u>   | <u>8874</u>       | <u>12918</u>   | <u>9659</u>     | <u>11111</u>   |
|                                                          | <b>Targets</b>                 | <u>8351</u>   | <u>17218</u>      | <u>89099</u>   | <u>63839</u>    | <u>42950</u>   |
|                                                          | <b>Distinct SNP-Gene pairs</b> | <u>610696</u> | <u>586659</u>     | <u>2158552</u> | <u>1417712</u>  | <u>1756270</u> |
|                                                          | <b>Total SNP-Target pairs</b>  | <u>610696</u> | <u>763559</u>     | <u>7524183</u> | <u>935370</u>   | <u>2972825</u> |
| <b>PERCENTAGE<br/>SIGNIFICANT</b>                        | <b>SNPs</b>                    | 26.28         | 15.27             | 37.64          | 28.65           | 31.69          |
|                                                          | <b>Genes</b>                   | 57.41         | 64.38             | 92.00          | 91.43           | 82.49          |
|                                                          | <b>Targets</b>                 | 57.41         | 27.14             | 63.14          | 50.11           | 45.81          |
|                                                          | <b>Distinct SNP-Gene pairs</b> | 20.25         | 8.68              | 21.12          | 15.59           | 18.29          |
|                                                          | <b>Total SNP-Target pairs</b>  | 20.25         | 8.42              | 24.10          | 3.83            | 17.43          |

The results of this table are depicted in S11 Fig. A genome-wide *cis*-eQTL analysis was performed as described in methods for all common SNPs (MAF > 5%) against gene quantifications profiled at gene-, transcript-, exon-, junction-, and intron-level. 'TOTAL' refers to the total number of elements tested in a genome-wide setting. The number of SNPs is different per quantification type as the analysis is run in *cis*, meaning only expression elements within +/-500kb of each SNP are considered; therefore, if there is no expression element within this distance, the SNP is not included in the analysis. 'Genes' refers to the number of distinct (unique) genes tested against, and 'targets' refers to the number of individual genes, transcripts, exons, junctions, and introns tested against measured using the corresponding profiling type. 'SIGNIFICANT' refers to the number of SNPs, genes etc. that pass a genome-wide false discovery rate (FDR) multiple testing threshold of 5%. 'PERCENTAGE SIGNIFICANT' refers to the percentage of SNPs, genes etc. that are significant as a percentage of the total tested.
